# Supplementary material
Source: publisher figshare collection journal article supplement (https://springernature.figshare.com/ndownloader/files/22675007)
Supplement: Supplementary file 1 [file 22675007]

Measurement(s),stereo image • wave height • peak wave period • wave direction
Technology Type(s),Camera Device • computational modeling technique
Factor Type(s),geographic location
Sample Characteristic - Environment,sea surface layer
Sample Characteristic - Location,Black Sea • Adriatic Sea • Yellow Sea • Iroise Sea
